# Supplementary material for: Downstream or upstream administration of P2Y12 receptor blockers in non-ST elevated acute coronary syndromes: study protocol for a randomized controlled trial
Source: Springer Nature journal article supplement (doi:10.1186/s13063-020-04859-1), 2020-11-24
Supplement: MOESM3 [file 18621004]

# Patient Screening

Record ID

\_\_\_\_\_

Screening date

\_\_\_\_\_  
( Date informed consent has been signed )

Birth date

\_\_\_\_\_

# Inclusion / Exclusion Criteria and First Randomization

Enrolment date (i.e. when informed consent has been signed)

\_\_\_\_\_ ( i.e. when informed consent has been signed )

Age \_\_\_\_\_

Confirm age

$\geq 75$  years old

$< 75$  years old

---

## Inclusion criteria

|                                                                                                                                                                                                                                                                                                                                   | Yes                   | No                    |
|-----------------------------------------------------------------------------------------------------------------------------------------------------------------------------------------------------------------------------------------------------------------------------------------------------------------------------------|-----------------------|-----------------------|
| Age $\geq 18$ AND $< 85$                                                                                                                                                                                                                                                                                                          | <input type="radio"/> | <input type="radio"/> |
| Non ST elevated acute coronary syndrome (unstable angina, non ST elevated myocardial infarction), with an onset of symptoms during the previous 24 hours                                                                                                                                                                          | <input type="radio"/> | <input type="radio"/> |
| An initial invasive strategy is chosen (the patient is expected to undergo coronary angiography within 72 h from admission)                                                                                                                                                                                                       | <input type="radio"/> | <input type="radio"/> |
| Subject is able to start therapy with a new P2Y12 inhibitor (prasugrel or ticagrelor) OR is on a maintenance dose of clopidogrel or ticlopidine and is able to switch to a new P2Y12 inhibitor (prasugrel or ticagrelor)                                                                                                          | <input type="radio"/> | <input type="radio"/> |
| Subject is able to verbally confirm understanding of risks and benefits of dual antiplatelet therapy in coronary acute syndromes and he/she or his/her legally authorized representative provides written informed consent prior to any Clinical Investigation related procedure, as approved by the appropriate Ethics Committee | <input type="radio"/> | <input type="radio"/> |
| Patient agrees to comply with follow-up evaluations                                                                                                                                                                                                                                                                               | <input type="radio"/> | <input type="radio"/> |

---



---

**General Exclusion criteria**

|                                                                                                                                                                                                                                                                                                     | Yes                   | No                    |
|-----------------------------------------------------------------------------------------------------------------------------------------------------------------------------------------------------------------------------------------------------------------------------------------------------|-----------------------|-----------------------|
| Know hypersensitivity/contraindication to aspirin, clopidogrel, prasugel, tricagrelor, heparin or bivalirulin, or sensitivity to contrast media, which can't be adequately pre-medicated.                                                                                                           | <input type="radio"/> | <input type="radio"/> |
| Platelet count < 100,000 cells/mm <sup>3</sup> or >700,000 cell/mm <sup>3</sup> , or a white blood cell (WBC) count < 3,000 cell/mm <sup>3</sup> within 7 days prior to index procedure.                                                                                                            | <input type="radio"/> | <input type="radio"/> |
| Shock                                                                                                                                                                                                                                                                                               | <input type="radio"/> | <input type="radio"/> |
| Have severe hepatic impairment defined as Child Pugh Class C                                                                                                                                                                                                                                        | <input type="radio"/> | <input type="radio"/> |
| Pregnant or nursing subjects and those who plan pregnancy in the period up to 3 years following screening. (Female subjects of child-bearing potential must have a negative pregnancy test done within 28 days prior to enrollment)                                                                 | <input type="radio"/> | <input type="radio"/> |
| Other medical illness (e.g., cancer or congestive heart failure) or known history of substance abuse (alcohol, cocaine, heroin etc.) as per physician judgment that may cause non-compliance with the protocol or confound the data interpretation or is associated with a limited life expectancy. | <input type="radio"/> | <input type="radio"/> |
| Subject is belonging to a vulnerable population (per investigator's judgment, e.g., subordinate hospital staff or sponsor staff) or subject unable to read or write.                                                                                                                                | <input type="radio"/> | <input type="radio"/> |

Currently participating in investigational drug or device trial that has not completed the primary endpoint or that clinically interferes with current trial endpoints. Subject must agree not to participate in any other clinical investigation for a period of three years following the index procedure, including clinical trials of medication and invasive procedures. Questionnaire-based studies, or other studies that are non-invasive and do not require medication are allowed.



---



---

### Bleeding Risk Exclusion Criteria

|                                                                                                                                | Yes                   | No                    |
|--------------------------------------------------------------------------------------------------------------------------------|-----------------------|-----------------------|
| Prior history of hemorrhagic or ischemic stroke, a transient ischemic attack (TIA), or sub-arachnoid hemorrhage.               | <input type="radio"/> | <input type="radio"/> |
| History of intracranial neoplasm, arteriovenous malformation, or aneurysm.                                                     | <input type="radio"/> | <input type="radio"/> |
| Have received fibrinolytic therapy within 48 hours of entry or randomization into the study.                                   | <input type="radio"/> | <input type="radio"/> |
| Have active pathological bleeding or history of bleeding diathesis.                                                            | <input type="radio"/> | <input type="radio"/> |
| Have clinical findings, in the judgment of the investigator, associated with a high risk of bleeding.                          | <input type="radio"/> | <input type="radio"/> |
| Have had recent surgery (within 4 weeks of entry into the study) or are scheduled to undergo surgery within the next 2 months. | <input type="radio"/> | <input type="radio"/> |

---



---

**Prior/Concomitant Therapy Exclusion Criteria**

|                                                                                                                                                                                                                                                              | Yes                                                                                                           | No                    |
|--------------------------------------------------------------------------------------------------------------------------------------------------------------------------------------------------------------------------------------------------------------|---------------------------------------------------------------------------------------------------------------|-----------------------|
| Have received a loading dose of a thienopyridine (ticlopidine, clopidogrel or prasugrel) or a maintenance dose of prasugrel or Ticlopidine or Ticagrelor within 7 days of entry into the study.                                                              | <input type="radio"/>                                                                                         | <input type="radio"/> |
| Are receiving a GPIIb/IIIa inhibitor (eptifibatide, tirofiban, or abciximab)                                                                                                                                                                                 | <input type="radio"/>                                                                                         | <input type="radio"/> |
| Are receiving warfarin or other coumarin derivatives.                                                                                                                                                                                                        | <input type="radio"/>                                                                                         | <input type="radio"/> |
| Are receiving or will receive oral anticoagulation or other oral antiplatelet therapy (except aspirin [ASA]) that cannot be safely discontinued within the next 3 months.                                                                                    | <input type="radio"/>                                                                                         | <input type="radio"/> |
| Are receiving daily treatment with nonsteroidal anti-inflammatory drugs (NSAIDs) or cyclooxygenase-2 (COX2) inhibitors that cannot be discontinued or are anticipated to require >2 weeks of daily treatment with NSAID or COX2 inhibitors during the study. | <input type="radio"/>                                                                                         | <input type="radio"/> |
| Concomitant therapy with a strong cytochrome P-4503A inhibitor or inducer.                                                                                                                                                                                   | <input type="radio"/>                                                                                         | <input type="radio"/> |
| Screening failure                                                                                                                                                                                                                                            | <input type="radio"/> True<br><input type="radio"/> False<br>(True if eligibility criteria are not satisfied) |                       |
| Strategy                                                                                                                                                                                                                                                     | <input type="radio"/> UPSTREAM<br><input type="radio"/> DOWNSTREAM                                            |                       |
| Randomization date                                                                                                                                                                                                                                           | _____                                                                                                         |                       |

# Demographics, Medical History and Clinical Presentation

Gender  M  
 F

Height \_\_\_\_\_  
((cm); (round to nearest whole number); (measured anytime during hospitalization))

Weight \_\_\_\_\_  
((kg); (round to nearest whole number); (measured anytime during hospitalization))

---



---

## Clinical presentation and risk stratification

Symptom onset \_\_\_\_\_  
(Note: must be within 24 h before enrollment (according to inclusion criteria))

ACS Type  Unstable angina  
 Non ST Elevation MI

Heart rate \_\_\_\_\_  
(bpm)

Systolic blood pressure \_\_\_\_\_  
(mmHg)

Sign of CHF at presentation  Yes  
 No

Killip Class  1 (no congestion signs)  
 2 (mild pulmonary congestion signs)  
 3 (acute pulmonary edema)  
 4 (cardiogenic shock)

|                                                     | Yes                   | No                    | Unknown               |
|-----------------------------------------------------|-----------------------|-----------------------|-----------------------|
| History of Hypertension                             | <input type="radio"/> | <input type="radio"/> | <input type="radio"/> |
| History of Hyperlipidemia                           | <input type="radio"/> | <input type="radio"/> | <input type="radio"/> |
| History of Smoke                                    | <input type="radio"/> | <input type="radio"/> | <input type="radio"/> |
| History of Diabetes Mellitus                        | <input type="radio"/> | <input type="radio"/> | <input type="radio"/> |
| Family History of Premature Coronary Artery Disease | <input type="radio"/> | <input type="radio"/> | <input type="radio"/> |
| Prior coronary stenosis $\geq$ 50%                  | <input type="radio"/> | <input type="radio"/> | <input type="radio"/> |
| ST deviation ECG                                    | <input type="radio"/> | <input type="radio"/> | <input type="radio"/> |

If Yes History of Smoking, how often:  Current (within last week)  
 Former

If Yes History of Diabetes Mellitus, method of medical treatment  Diet only  
 Insulin  
 Oral Tx  
(check all that apply)

|                                              |                                                                                                                                                                                                                             |
|----------------------------------------------|-----------------------------------------------------------------------------------------------------------------------------------------------------------------------------------------------------------------------------|
| Type of ST deviation                         | <input type="radio"/> ST-segment depression<br><input type="radio"/> T-wave inversion<br><input type="radio"/> Transient ST-elevation                                                                                       |
| Prior Myocardial Infarction                  | <input type="radio"/> Yes<br><input type="radio"/> No                                                                                                                                                                       |
| Prior Percutaneous Coronary Intervention     | <input type="radio"/> Yes<br><input type="radio"/> No                                                                                                                                                                       |
| Prior Coronary Artery Bypass Graft Surgery   | <input type="radio"/> Yes<br><input type="radio"/> No                                                                                                                                                                       |
| History of Prior Angina                      | <input type="radio"/> Yes<br><input type="radio"/> No                                                                                                                                                                       |
| History of Congestive Heart Failure (CHF)    | <input type="radio"/> Yes<br><input type="radio"/> No                                                                                                                                                                       |
| NYHA Class                                   | <input type="radio"/> 1<br><input type="radio"/> 2<br><input type="radio"/> 3<br><input type="radio"/> 4                                                                                                                    |
| Prior Nonhemorrhagic Stroke                  | <input type="radio"/> Yes<br><input type="radio"/> No                                                                                                                                                                       |
| Prior Hemorrhagic Stroke                     | <input type="radio"/> Yes<br><input type="radio"/> No                                                                                                                                                                       |
| History of Dyspnea                           | <input type="radio"/> Yes<br><input type="radio"/> No                                                                                                                                                                       |
| Chronic obstructive pulmonary disease (COPD) | <input type="radio"/> Yes<br><input type="radio"/> No                                                                                                                                                                       |
| History of Chronic Renal Insufficiency       | <input type="radio"/> Yes<br><input type="radio"/> No<br>(GFR < 60 ml/min/1,73/m <sup>2</sup> for ≥3 months)                                                                                                                |
| Patient is currently on dialysis             | <input type="radio"/> Yes<br><input type="radio"/> No                                                                                                                                                                       |
| History of Cardiac Rhythm/Rate Disturbances  | <input type="radio"/> Yes<br><input type="radio"/> No<br>(Ventricular Tachycardia or Fibrillation, Atrial Fibrillation or flutter, Defibrillator implant, Pacemaker implant)                                                |
| Specify                                      | <input type="checkbox"/> Ventricular Tachycardia or Fibrillation<br><input type="checkbox"/> Atrial Fibrillation or flutter<br><input type="checkbox"/> Defibrillator implant<br><input type="checkbox"/> Pacemaker implant |
| ≥ 2 Anginal events in prior 24h              | <input type="radio"/> Yes<br><input type="radio"/> No                                                                                                                                                                       |
| Aspirin in prior 7 days                      | <input type="radio"/> Yes<br><input type="radio"/> No                                                                                                                                                                       |
| Elevated cardiac biomarkers                  | <input type="radio"/> Yes<br><input type="radio"/> No                                                                                                                                                                       |

|                             |                                                                  |
|-----------------------------|------------------------------------------------------------------|
| First Troponin I / T        | <input type="radio"/> Positive<br><input type="radio"/> Negative |
| Baseline hematocrit         | _____<br>(% (ex. "45.3" or "35.41"))                             |
| Creatinine level            | _____<br>(mg/dL; (ex. "1.2" or "1.73"))                          |
| Creatinine clearance        | _____<br>(mL/min; Estimated with the Cockcroft-Gault formula)    |
| Prior vascular disease      | <input type="radio"/> Yes<br><input type="radio"/> No            |
| Cardiac arrest ad admission | <input type="radio"/> Yes<br><input type="radio"/> No            |
| TIMI Risk Score             | _____                                                            |
| Grace Risk Score            | _____                                                            |
| Crusade Risk Score          | _____                                                            |



# Medications

---



---

## PRE-ADMISSION MEDICATIONS (ongoing medications before first medical contact [FMC])

|                              | Yes                   | No                    |
|------------------------------|-----------------------|-----------------------|
| Aspirin                      | <input type="radio"/> | <input type="radio"/> |
| Clopidogrel                  | <input type="radio"/> | <input type="radio"/> |
| Ticlopidine                  | <input type="radio"/> | <input type="radio"/> |
| Beta Blocker                 | <input type="radio"/> | <input type="radio"/> |
| Calcium Channel Blocker      | <input type="radio"/> | <input type="radio"/> |
| ACE Inhibitor                | <input type="radio"/> | <input type="radio"/> |
| Angiotensin Receptor Blocker | <input type="radio"/> | <input type="radio"/> |
| Insulin                      | <input type="radio"/> | <input type="radio"/> |
| Oral diabetes medications    | <input type="radio"/> | <input type="radio"/> |
| Statin                       | <input type="radio"/> | <input type="radio"/> |
| PPI                          | <input type="radio"/> | <input type="radio"/> |

---



---

## IN-HOSPITAL MEDICATIONS (medications between first medical contact [FMC] and hospital discharge)

Aspirin  Yes  
 No

Aspirin loading dose performed  Yes  
 No

Specify Aspirin loading dose (mg) \_\_\_\_\_  
(mg)

Aspirin loading dose date/time \_\_\_\_\_

Aspirin maintenance dose ( $\geq 1$  maintenance dose during hospital stay)  Yes  
 No

Clopidogrel  Yes  
 No

Clopidogrel loading dose performed  Yes  
 No

!!!! COMPLETE PROTOCOL DEVIATION FORM !!!!

Clopidogrel loading dose date/time \_\_\_\_\_

Reason of Clopidogrel loading dose \_\_\_\_\_

Specify Clopidogrel loading dose  300 mg  
 600 mg

Clopidogrel maintenance dose ( $\geq 1$  maintenance dose during hospital stay)  Yes  
 No

|                                                                                |                                                                                              |
|--------------------------------------------------------------------------------|----------------------------------------------------------------------------------------------|
| Clopidogrel discontinuation during hospital stay                               | <input type="radio"/> Yes<br><input type="radio"/> No                                        |
| Reason for clopidogrel discontinuation during hospital stay                    | <input type="radio"/> Switch to Ticagrelor/Prasugrel<br><input type="radio"/> Other reason   |
| Ticlopidine                                                                    | <input type="radio"/> Yes<br><input type="radio"/> No                                        |
| Ticlopidine loading dose performed                                             | <input type="radio"/> Yes<br><input type="radio"/> No                                        |
| Specify Ticlopidine loading dose (mg)                                          | _____ (mg)                                                                                   |
| Ticlopidine loading dose date/time                                             | _____                                                                                        |
| Ticlopidine maintenance dose ( $\geq 1$ maintenance dose during hospital stay) | <input type="radio"/> Yes<br><input type="radio"/> No                                        |
| Ticlopidine discontinuation during hospital stay                               | <input type="radio"/> Yes<br><input type="radio"/> No                                        |
| Reason for Ticlopidine discontinuation                                         | <input type="radio"/> Switch to Ticagrelor / Prasugrel<br><input type="radio"/> Other reason |
| Beta Blocker                                                                   | <input type="radio"/> Yes<br><input type="radio"/> No                                        |
| Calcium Channel Blocker                                                        | <input type="radio"/> Yes<br><input type="radio"/> No                                        |
| ACE Inhibitor                                                                  | <input type="radio"/> Yes<br><input type="radio"/> No                                        |
| Angiotensin Receptor Blocker                                                   | <input type="radio"/> Yes<br><input type="radio"/> No                                        |
| Insulin                                                                        | <input type="radio"/> Yes<br><input type="radio"/> No                                        |
| Diabetic Oral Medication                                                       | <input type="radio"/> Yes<br><input type="radio"/> No                                        |
| Statin                                                                         | <input type="radio"/> Yes<br><input type="radio"/> No                                        |
| PPI                                                                            | <input type="radio"/> Yes<br><input type="radio"/> No                                        |
| Heparin (note: excluding periprocedural heparin)                               | <input type="radio"/> Yes<br><input type="radio"/> No                                        |
| Heparin loading dose                                                           | <input type="radio"/> Yes<br><input type="radio"/> No                                        |
| Specify Heparin loading dose                                                   | _____ (U)                                                                                    |
| Heparin loading dose date/time                                                 | _____                                                                                        |
| Heparin continuous infusion                                                    | <input type="radio"/> Yes<br><input type="radio"/> No                                        |

GP-IIb/IIIa inhibitors (note: excluding periprocedural  
GP-IIb/IIIa inhibitors)

- Yes
- No

GP-IIb/IIIa inhibitors loading dose performed

- Yes
- No

GP-IIb/IIIa inhibitors loading dose date/time

\_\_\_\_\_

GP-IIb/IIIa inhibitors i.v. infusion

- Yes
- No

## Study Drugs

---

---

### Ticagrelor

- Ticagrelor  Yes  
 No
- Ticagrelor loading dose performed  Yes  
 No
- Specify Ticagrelor loading dose \_\_\_\_\_
- Ticagrelor loading dose date/time \_\_\_\_\_
- Ticagrelor maintenance dose ( $\geq 1$  maintenance dose during hospital stay)  Yes  
 No
- Ticagrelor premature discontinuation occurred (in-hospital)?  Yes  
 No
- Specify reason for ticagrelor premature discontinuation (in-hospital) \_\_\_\_\_

---

---

### Prasugrel

- Prasugrel  Yes  
 No
- Prasugrel loading dose performed  Yes  
 No
- Prasugrel loading dose date/time \_\_\_\_\_
- Prasugrel maintenance dose ( $\geq 1$  maintenance dose during hospital stay)  Yes  
 No
- Specify Prasugrel loading dose  60 mg  
 30 mg
- Specify reason for 30 mg loading dose of Prasugrel \_\_\_\_\_
- !!!! complete protocol deviation form !!!!
- Specify Prasugrel maintenance dose  10 mg  
 5 mg
- Specify reason for 5 mg maintenance dose of Prasugrel \_\_\_\_\_
- Prasugrel premature discontinuation occurred (in-hospital)?  Yes  
 No
- Specify reason for prasugrel premature discontinuation (in-hospital) \_\_\_\_\_

# Coronary Angiography

Coronary angiography performed?

- Yes  
 No

Reason for not performing coronary angiography

- After enrollment, patient has switched from  
invasive strategy to conservative strategy  
 Death (before performing angiography)  
 Other (specify)

Specify other reason for not performing coronary  
angiography

\_\_\_\_\_

Date/Hour coronary angiography start

\_\_\_\_\_

CAD extension

- 1 Vessel Disease  
 2 Vessel Disease  
 3 Vessel Disease  
 Left main involvement (requiring intervention),  
irrespective of CAD extension  
 Subclinical atherosclerosis (absence of  
functionally or angiographically significant  
lesions)  
 Intact coronary arteries (no lesions  
angiographically)

Vascular approach

- radial  
 femoral  
 other

Vascular access closure device

- Yes  
 No

Vascular access closure device result

- Success  
 Unsuccess

Therapeutic indication after coronary angiography

- PCI  
 CABG  
 Hybrid procedure (PCI + CABG)  
 Medical therapy only

PCI scheduled

- During current hospital admission  
 During subsequent hospital admission

CABG scheduled

- During current hospital admission  
 During subsequent hospital admission

## Procedure: PCI

PCI performed  Yes  
 No

Date/Hour PCI start \_\_\_\_\_

PCI target vessel(s)  LM  
 LAD  
 LCx  
 RCA  
 Venous graft  
 Arterial graft

Procedure success  Yes  
 No

BMS: n. stent implanted \_\_\_\_\_

DES: n. stent implanted \_\_\_\_\_

|                                                                      | Yes                   | No                    |
|----------------------------------------------------------------------|-----------------------|-----------------------|
| Treatment of bifurcation lesion(s)                                   | <input type="radio"/> | <input type="radio"/> |
| Rotablator                                                           | <input type="radio"/> | <input type="radio"/> |
| Basal TIMI flow 0/1                                                  | <input type="radio"/> | <input type="radio"/> |
| No-reflow                                                            | <input type="radio"/> | <input type="radio"/> |
| Procedural complications                                             | <input type="radio"/> | <input type="radio"/> |
| Complete revascularization                                           | <input type="radio"/> | <input type="radio"/> |
| Final worsening of TIMI flow (from 2-3 to 0-1 at any treated lesion) | <input type="radio"/> | <input type="radio"/> |

Specify complete revascularization  Single procedure  
 Multiple procedures

---

### Periprocedural GPIIb/IIIa

Periprocedural GPIIb/IIIa inhibitors  Yes  
 No

Loading dose during PCI  Yes  
 No

Type of loading dose during PCI  i.v.  
 intracoronary

GPIIbIIIa inhibitors infusion  Yes  
 No

GPIIbIIIa inhibitors suspended immediately after PCI  Yes  
 No

---

---

**Periprocedural Unfractionated Heparin**

Periprocedural Unfractionated Heparin

- Yes  
 No

Units administered during PCI

---

Protamine sulphate administered

- Yes  
 No

Reason

- Major bleeding (BARC 3-5)  
 Facilitate hemostasis  
 other

---

---

**Periprocedural LMWH**

Periprocedural LMWH

- Yes  
 No

Specify type of periprocedural LMWH and dose

---

---

---

**Periprocedural Bivalirudin**

Periprocedural bivalirudin

- Yes  
 No

Bivalirudin periprocedural loading dose

- Yes  
 No

Specify loading dose (mg)

- Yes  
 No

Bivalirudin periprocedural infusion

- Yes  
 No

# Procedure: CABG

|                                                             |                                                       |                       |
|-------------------------------------------------------------|-------------------------------------------------------|-----------------------|
| CABG performed                                              | <input type="radio"/> Yes                             |                       |
|                                                             | <input type="radio"/> No                              |                       |
| Date/Hour CABG start                                        | _____                                                 |                       |
| Anticoagulant therapy between coronary angiography and CABG | <input type="checkbox"/> None                         |                       |
|                                                             | <input type="checkbox"/> Unfractionated heparin       |                       |
|                                                             | <input type="checkbox"/> Low molecular weight heparin |                       |
|                                                             | <input type="checkbox"/> Fondaparinux                 |                       |
|                                                             | <input type="checkbox"/> Bivalirudin                  |                       |
|                                                             | <input type="checkbox"/> Warfarin/NOACs               |                       |
| Antiplatelet agent(s) discontinued before CABG              | <input type="radio"/> Yes                             |                       |
|                                                             | <input type="radio"/> No                              |                       |
| Specify                                                     | <input type="checkbox"/> Aspirin                      |                       |
|                                                             | <input type="checkbox"/> Clopidogrel                  |                       |
|                                                             | <input type="checkbox"/> Ticlopidine                  |                       |
|                                                             | <input type="checkbox"/> Prasugrel                    |                       |
|                                                             | <input type="checkbox"/> Ticagrelor                   |                       |
| Specify date / hour P2Y12 inhibitor discontinuation         | _____                                                 |                       |
| Bridging with GPIIb/IIIa performed                          | <input type="radio"/> Yes                             |                       |
|                                                             | <input type="radio"/> No                              |                       |
| Antiplatelet therapy re-started after CABG                  | <input type="radio"/> Yes                             |                       |
|                                                             | <input type="radio"/> No                              |                       |
| Date / hour antiplatelet therapy re-started after CABG      | _____                                                 |                       |
| Which drugs re-started                                      | <input type="checkbox"/> ASA                          |                       |
|                                                             | <input type="checkbox"/> Clopidogrel                  |                       |
|                                                             | <input type="checkbox"/> Ticlopidina                  |                       |
|                                                             | <input type="checkbox"/> Prasugrel                    |                       |
|                                                             | <input type="checkbox"/> Ticagrelor                   |                       |
| Procedure success                                           | <input type="radio"/> Yes                             |                       |
|                                                             | <input type="radio"/> No                              |                       |
| N. grafts implanted (Total)                                 | _____                                                 |                       |
| N. arterial grafts                                          | _____                                                 |                       |
|                                                             | Yes                                                   | No                    |
| Emergency CABG for failed PCI                               | <input type="radio"/>                                 | <input type="radio"/> |
| Complete revascularization                                  | <input type="radio"/>                                 | <input type="radio"/> |
| Procedural complications                                    | <input type="radio"/>                                 | <input type="radio"/> |



# Hospital Discharge

Discharge status

- Alive  
 Dead

Death from vascular causes (death from cardiovascular causes or cerebrovascular causes and any death without another known cause)

- Yes  
 No

Which vascular causes

- Stent thrombosis  
 Fatal myocardial infarction  
 Cerebrovascular event  
 Other cardiovascular event

Date of discharge

\_\_\_\_\_

Date of death

\_\_\_\_\_

Discharge modality

- Home  
 Transfer to another department  
 Transfer to another hospital

Final diagnosis

- Initial UA/NSTEMI diagnosis confirmed  
 Initial UA/NSTEMI diagnosis excluded

Please specify final diagnosis (if different from UA/NSTEMI)

\_\_\_\_\_ (e.g. myocarditis, Tako-tsubo...)

---



---

## THERAPY AT THE TIME OF HOSPITAL DISCHARGE

|                           | Yes                   | No                    |
|---------------------------|-----------------------|-----------------------|
| Aspirin                   | <input type="radio"/> | <input type="radio"/> |
| Clopidogrel               | <input type="radio"/> | <input type="radio"/> |
| Ticlopidine               | <input type="radio"/> | <input type="radio"/> |
| Prasugrel                 | <input type="radio"/> | <input type="radio"/> |
| Ticagrelor                | <input type="radio"/> | <input type="radio"/> |
| Beta blocker              | <input type="radio"/> | <input type="radio"/> |
| Calcium Channel Blocker   | <input type="radio"/> | <input type="radio"/> |
| Insulin                   | <input type="radio"/> | <input type="radio"/> |
| oral diabetes medications | <input type="radio"/> | <input type="radio"/> |
| Statin                    | <input type="radio"/> | <input type="radio"/> |
| PPI                       | <input type="radio"/> | <input type="radio"/> |
| Warfarin / NOACs          | <input type="radio"/> | <input type="radio"/> |
| LMWH                      | <input type="radio"/> | <input type="radio"/> |

Dual anti platelet therapy at discharge?

- Yes  
 No

Expected time dual antiplatelet therapy administration

- 1 month  
 < 6 months  
 =< 12 months  
 > 12 months  
 indeterminate

# Follow-up

---



---

## Adverse events from last follow up

|                                                                                                                                   |                                                                                                                                                                                                |
|-----------------------------------------------------------------------------------------------------------------------------------|------------------------------------------------------------------------------------------------------------------------------------------------------------------------------------------------|
| Death                                                                                                                             | <input type="radio"/> Yes                                                                                                                                                                      |
|                                                                                                                                   | <input type="radio"/> No                                                                                                                                                                       |
| Death from vascular causes (death from cardiovascular causes or cerebrovascular causes and any death without another known cause) | <input type="radio"/> Yes                                                                                                                                                                      |
|                                                                                                                                   | <input type="radio"/> No                                                                                                                                                                       |
| Which vascular causes                                                                                                             | <input type="radio"/> Stent thrombosis<br><input type="radio"/> Fatal myocardial infarction<br><input type="radio"/> Cerebrovascular event<br><input type="radio"/> Other cardiovascular event |
| Specify                                                                                                                           | _____                                                                                                                                                                                          |
| Specify cause of non cardiac death                                                                                                | _____                                                                                                                                                                                          |
| Date of death                                                                                                                     | _____                                                                                                                                                                                          |
| Non Fatal Myocardial Infarction                                                                                                   | <input type="radio"/> Yes                                                                                                                                                                      |
|                                                                                                                                   | <input type="radio"/> No                                                                                                                                                                       |
| Date of Non Fatal Myocardial Infarction                                                                                           | _____                                                                                                                                                                                          |
|                                                                                                                                   | (IF MULTIPLE EVENTS: DATE OF FIRST EVENT)                                                                                                                                                      |
| Non fatal stroke                                                                                                                  | <input type="radio"/> Yes                                                                                                                                                                      |
|                                                                                                                                   | <input type="radio"/> No                                                                                                                                                                       |
| Date of non fatal stroke                                                                                                          | _____                                                                                                                                                                                          |
|                                                                                                                                   | (IF MULTIPLE EVENTS: DATE OF FIRST EVENT)                                                                                                                                                      |
| TIA (Transitory Ischemic Attack)                                                                                                  | <input type="radio"/> Yes                                                                                                                                                                      |
|                                                                                                                                   | <input type="radio"/> No                                                                                                                                                                       |
| Date of TIA                                                                                                                       | _____                                                                                                                                                                                          |
|                                                                                                                                   | (IF MULTIPLE EVENTS: DATE OF FIRST EVENT)                                                                                                                                                      |
| Recurrent myocardial ischemia                                                                                                     | <input type="radio"/> Yes                                                                                                                                                                      |
|                                                                                                                                   | <input type="radio"/> No                                                                                                                                                                       |
| Date of recurrent myocardial ischemia                                                                                             | _____                                                                                                                                                                                          |
|                                                                                                                                   | (IF MULTIPLE EVENTS: DATE OF FIRST EVENT)                                                                                                                                                      |

---



---

## Any stent thrombosis according to the ARC criteria

|                           | Yes                   | No                    |
|---------------------------|-----------------------|-----------------------|
| Possible Stent thrombosis | <input type="radio"/> | <input type="radio"/> |
| Probable Stent thrombosis | <input type="radio"/> | <input type="radio"/> |

|                                                     |                                                                                                                                                         |                       |
|-----------------------------------------------------|---------------------------------------------------------------------------------------------------------------------------------------------------------|-----------------------|
| Definite Stent thrombosis                           | <input type="radio"/>                                                                                                                                   | <input type="radio"/> |
| Date possible stent thrombosis                      | _____                                                                                                                                                   |                       |
| Date probable stent thrombosis                      | _____                                                                                                                                                   |                       |
| Date definite stent thrombosis                      | _____                                                                                                                                                   |                       |
| Other arterial thrombotic event                     | <input type="radio"/> Yes<br><input type="radio"/> No                                                                                                   |                       |
| Specify event                                       | _____                                                                                                                                                   |                       |
| Target vessel revascularization (TVR)               | <input type="radio"/> Yes<br><input type="radio"/> No                                                                                                   |                       |
| Date target vessel revascularization                | _____                                                                                                                                                   |                       |
|                                                     | (IF MULTIPLE EVENTS: DATE OF FIRST EVENT)                                                                                                               |                       |
| Target lesion revascularization (TLR)               | <input type="radio"/> Yes<br><input type="radio"/> No                                                                                                   |                       |
| Date of target lesion revascularization             | _____                                                                                                                                                   |                       |
|                                                     | (IF MULTIPLE EVENTS: DATE OF FIRST EVENT)                                                                                                               |                       |
| Premature discontinuation of study drug             | <input type="radio"/> Yes<br><input type="radio"/> No                                                                                                   |                       |
| Date premature discontinuation of study drug        | _____                                                                                                                                                   |                       |
| Reason for premature discontinuation of study drug? | <input type="radio"/> Because of adverse event<br><input type="radio"/> Because of patient's unwillingness to continue<br><input type="radio"/> Other   |                       |
| Specify                                             | _____                                                                                                                                                   |                       |
| Adherence to study drug                             | <input type="radio"/> Yes<br><input type="radio"/> No<br>(use of more than 80% of the study medication from last follow up as assessed by investigator) |                       |
| Major Bleeding (BARC 3-5)                           | <input type="radio"/> Yes<br><input type="radio"/> No                                                                                                   |                       |
| If yes, specify type of bleeding                    | <input type="radio"/> BARC 3<br><input type="radio"/> BARC 4<br><input type="radio"/> BARC 5                                                            |                       |
| which BARC 3 bleeding                               | <input type="radio"/> 3a<br><input type="radio"/> 3b<br><input type="radio"/> 3c                                                                        |                       |
| which BARC 5 bleeding                               | <input type="radio"/> 5a<br><input type="radio"/> 5b                                                                                                    |                       |

# Adverse Event

Adverse Event number \_\_\_\_\_

Event Description \_\_\_\_\_

Worsening of pre-study condition  
 Yes  
 No

If YES, provide details \_\_\_\_\_

Onset date and time \_\_\_\_\_

Stop date and time \_\_\_\_\_

Seriousness criteria  
 Not Serious  
 Death  
 Life threatening  
 Requiring hospitalization or prolongation of hospitalization  
 Results in persistent or significant disability/incapacity  
 Congenital anomaly  
 Important Medical Event  
(Select all the applicable)

!!!!!!!!! Please complete JRO SAE form !!!!!!!!!!!!!!!!

Severity  
 Mild  
 Moderate  
 Severe

Action taken  
 None  
 Study drug dose reduced  
 Study drug dose increased  
 Pharmacological treatment  
 Study drug dose temporary interrupted  
 Study drug dose definitely interrupted  
 Surgery  
 Other

Action detail \_\_\_\_\_

Causal relationship with the study drugs  
 NO. there is no reasonable causal relationship  
 YES. there is a reasonable causal relationship

IF there is a reasonable causal relationship  
 Certain  
 Probable  
 Possible

Outcome  
 Recovered/resolved  
 Recovering/resolving  
 Recovered/resolved with sequelae  
 Not recovered/not resolved  
 Fatal  
 Unknown

Provide details \_\_\_\_\_

Reason for drop-out  
 Yes  
 No

Comments

---

# Protocol Deviation

Describe Protocol Deviation

---

# PLEASE INSERT First Randomization Reference Data

Record ID (Assigned to the Subject on the Enrollment)

---

Enrollment date

---

Date of the First Randomization

---

Birth date

---

Age

---

The subject is

- $\geq$  75 years old
- $<$  75 years old

# Second Randomization ( prasugrel or ticagrelor in PCI patients - DOWNSTREAM ARM ONLY )

PCI has been chosen as the initial revascularization strategy

- Yes
- No  
(click "No" if CABG has been performed as initial treatment before PCI)

Downstream PCI strategy

- Ticagrelor
- Prasugrel

Date 2nd randomization

\_\_\_\_\_
